# Supplementary material for: Microscopic origin of graphene nanosheets derived from coal-tar pitch by treating Al4C3 as the intermediate
Source: Royal Society of Chemistry journal article supplement (doi:10.1039/d1cp01575c), 2021-01-01
Supplement: d1cp01575c1.pdf [file d1cp01575c1.pdf]

**Supplementary material:**

Microscopic origin of graphene nanosheets derived from coal-tar pitch by  
treating  $\text{Al}_4\text{C}_3$  as the intermediate

Peng Lin<sup>1</sup>, Yinggan Zhang<sup>2</sup>, Xiaolin Tan<sup>1</sup>, Rui Xiong<sup>1</sup>, Baisheng Sa<sup>1,\*</sup> and Qilang  
Lin<sup>1,\*\*</sup>

<sup>1</sup> *Key Laboratory of Eco-materials Advanced Technology, College of Materials  
Science and Engineering, Fuzhou University, Fuzhou 350108, P. R. China*

<sup>2</sup> *College of Materials, Fujian Provincial Key Laboratory of Theoretical and  
Computational Chemistry, Xiamen University, Xiamen 361005, P. R. China*

Corresponding authors: [bssa@fzu.edu.cn](mailto:bssa@fzu.edu.cn) (B. Sa); [linqilang@fzu.edu.cn](mailto:linqilang@fzu.edu.cn) (Q. Lin).

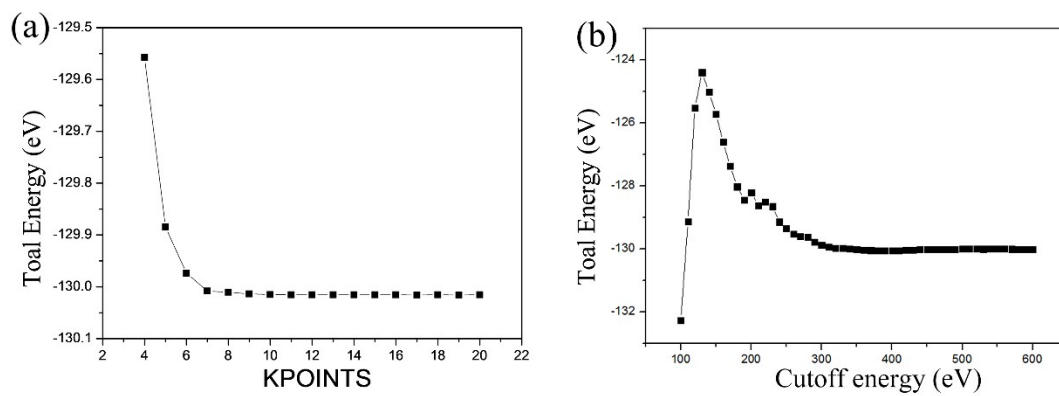

Figure S1. (a) The KPOINTS mesh and (b) cutoff energy convergence test results

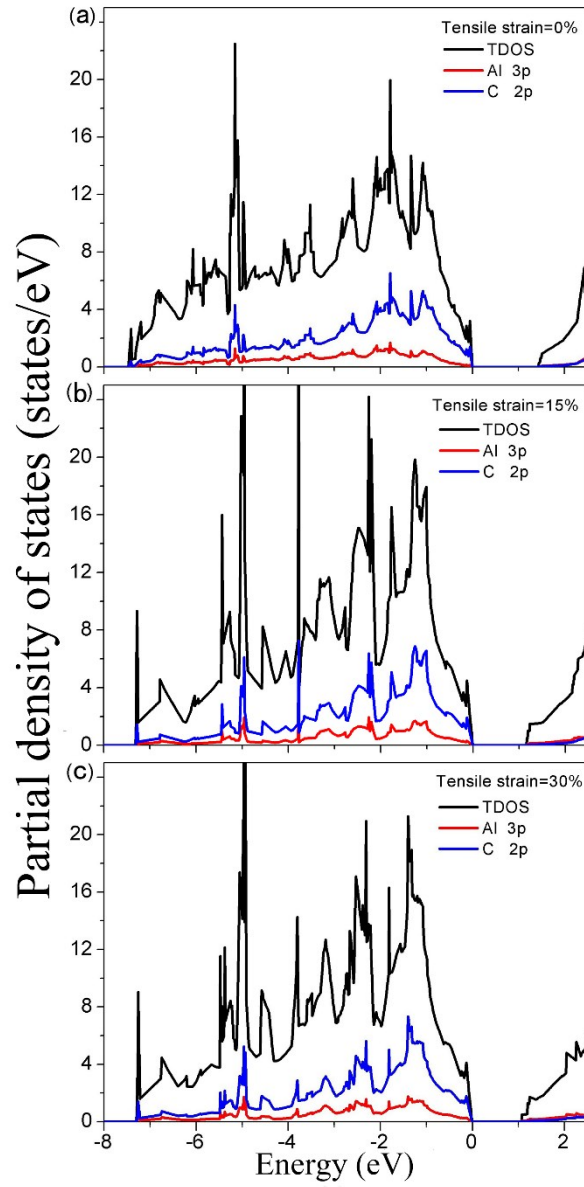

**Figure S2.** The calculated total and partial density of states of  $\text{Al}_4\text{C}_3$  under (a) 0%, (b) 15% and (c) 30% tensile strain along  $[0001]$  direction by DFT-D3 approach.

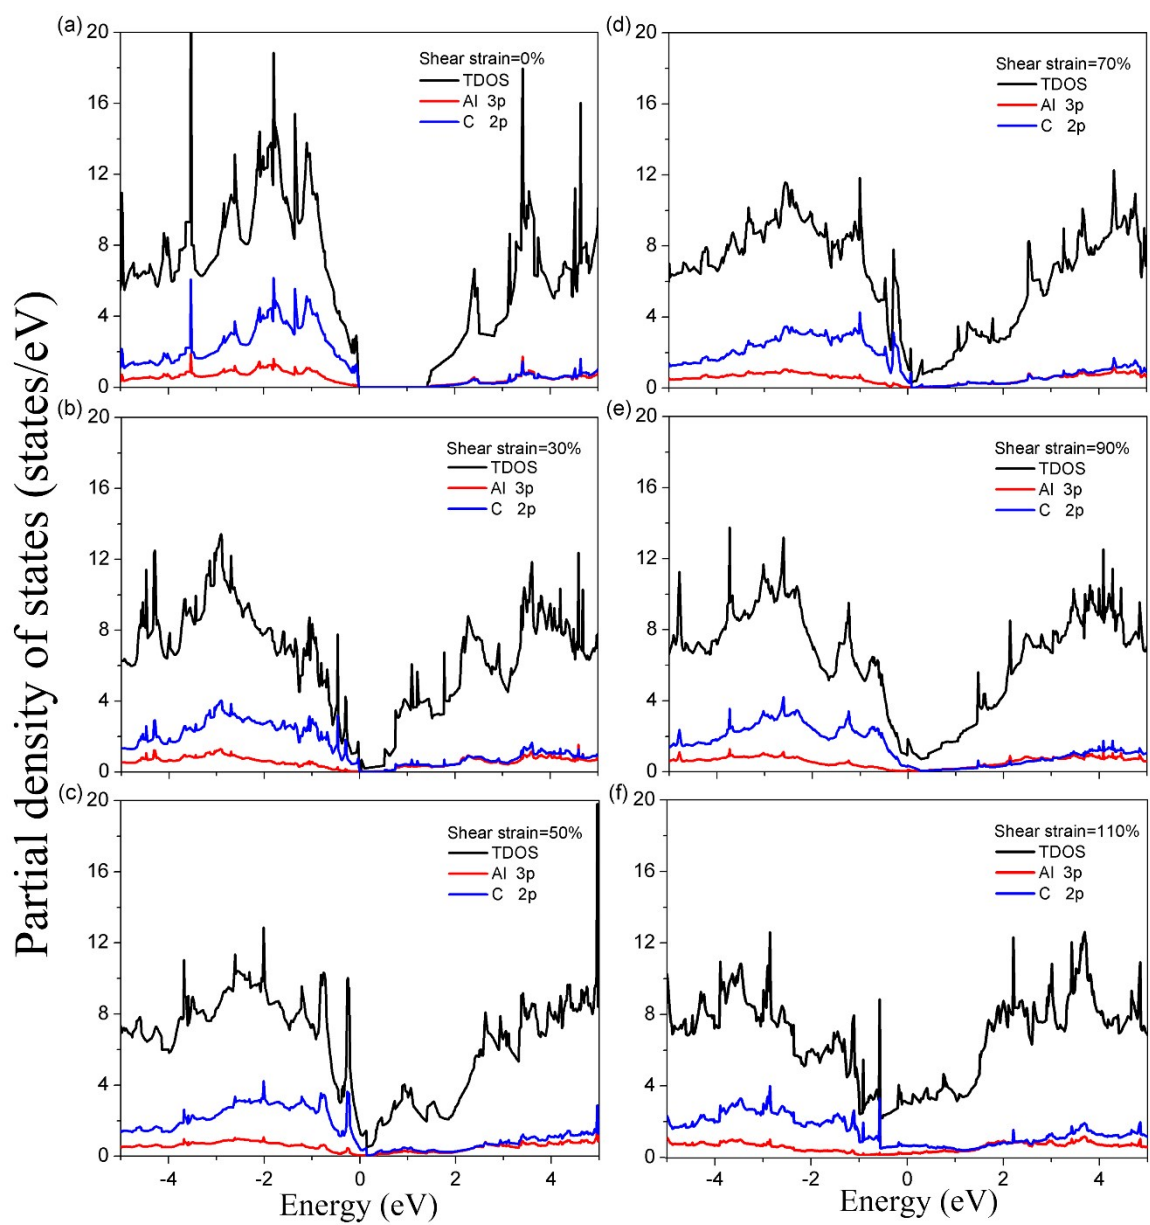

**Figure S3.** The calculated total and partial density of states of  $\text{Al}_4\text{C}_3$  under (a) 0%, (b) 30%, (c) 50%, (d) 70%, (e) 90% and (f) 110% shear strain along the (0001)[110] direction using DFT-D3 functional.
